# Supplementary material
Source: Springer Nature journal article supplement (https://www.springermedizin.de/resource/supplementary/12889_2011_4290_MOESM1_ESM.pdf/9491798)

Nelson-Aalen cumulative hazard estimates

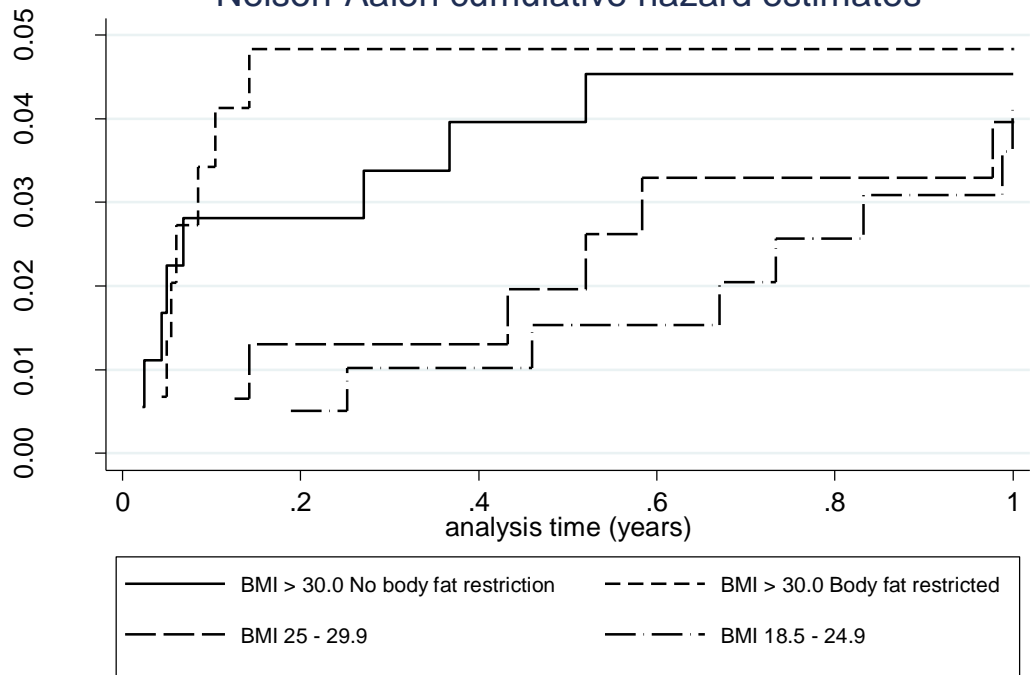

Supplement: MOESM1 [file 9491798]
